# Supplementary material for: Rutin and quercetin, bioactive compounds from tartary buckwheat, prevent liver inflammatory injury
Source: Royal Society of Chemistry journal article supplement (doi:10.1039/c3fo30389f), 2013-01-01
Supplement: c3fo30389f.pdf [file c3fo30389f.pdf]

**Rutin and quercetin, bioactive compounds from tartary buckwheat,  
prevents liver inflammatory injury**

Chia-Chen Lee<sup>a</sup> Siou-Ru Shen<sup>a</sup> Ying-Jang Lai<sup>b</sup> She-Ching Wu<sup>a\*</sup>

Supplementary Data

**Table S1**

The dietary formula of control and ethanol liquid diets.

| Ingredient               | Control liquid diet | Ethanol liquid diet                           |
|--------------------------|---------------------|-----------------------------------------------|
|                          | g/liter of diet     |                                               |
| Casein                   | 41.4                | 41.4                                          |
| L-cystine                | 0.5                 | 0.5                                           |
| DL-methionine            | 0.3                 | 0.3                                           |
| Corn oil                 | 8.5                 | 8.5                                           |
| Olive oil                | 28.4                | 28.4                                          |
| Safflower oil            | 2.7                 | 2.7                                           |
| Maltose dextrin          | 115.2               | 25.6                                          |
| Cellulose                | 10                  | 10                                            |
| Salt mix <sup>a</sup>    | 8.75                | 8.75                                          |
| Vitamin mix <sup>b</sup> | 2.5                 | 2.5                                           |
| Choline bitartrate       | 0.53                | 0.53                                          |
| Xanthan gum              | 3                   | 3                                             |
| Ethanol                  | -                   | 132.18 g of diet added 67.3 mL of 95% ethanol |

<sup>a</sup> Salt mixture contained the following (mg/liter of diet): NaCl, 3400; MgSO<sub>4</sub>, 1000; CuSO<sub>4</sub>·5H<sub>2</sub>O, 250; CaCO<sub>3</sub>, 2100; CaHPO<sub>4</sub>, 250; KI, 500; MnSO<sub>4</sub>·H<sub>2</sub>O, 200; ZnCl<sub>2</sub>, 300; K<sub>2</sub>HPO<sub>4</sub>, 150; FeC<sub>6</sub>H<sub>5</sub>O<sub>7</sub>, 600.

<sup>b</sup> Vitamin mixture contained the following (mg/liter of diet): vitamin A, 0.4; vitamin D3, 0.0025; vitamin B1, 1.7; vitamin B2, 1.6; nicotinic acid, 18; vitamin B6, 2.5; vitamin B12 0.001; vitamin C, 60; vitamin E, 10; folic acid, 0.2; pantothenic acid, 6; biotin, 0.2.

**Table S2**

Effects of EEB on serum and hepatic TG and TC in mice treated with ethanol induction.

| Groups*             | Serum TG<br>mg/dL          | Serum TC                   | Hepatic TG               | Hepatic TC             |
|---------------------|----------------------------|----------------------------|--------------------------|------------------------|
| Normal              | 104.5 ± 10.5               | 128.7 ± 8.8                | 16.7 ± 2.0               | 2.5 ± 0.3              |
| Ethanol             | 158.0 ± 17.2**             | 176.0 ± 8.8**              | 24.5 ± 4.9*              | 3.6 ± 0.7*             |
| Ethanol + silymarin | 107.2 ± 32.8 <sup>#</sup>  | 129.6 ± 7.7 <sup>##</sup>  | 17.0 ± 2.7               | 3.5 ± 0.4              |
| Ethanol + EEB       | 107.0 ± 12.1 <sup>##</sup> | 142.3 ± 3.2 <sup>##</sup>  | 13.3 ± 2.9 <sup>#</sup>  | 2.6 ± 0.5 <sup>#</sup> |
| Ethanol + rutin     | 102.8 ± 7.9 <sup>##</sup>  | 136.5 ± 6.4 <sup>##</sup>  | 13.9 ± 2.2 <sup>#</sup>  | 2.5 ± 0.6 <sup>#</sup> |
| Ethanol + quercetin | 101.3 ± 18.0 <sup>##</sup> | 142.3 ± 13.8 <sup>##</sup> | 12.3 ± 1.9 <sup>##</sup> | 3.1 ± 0.2              |

Each value represents the mean ± S.D. (n = 6). Data are regarded statistically significant with \**P* < 0.05, \*\**P* < 0.01 vs. normal group and <sup>#</sup>*P* < 0.05, <sup>##</sup>*P* < 0.01 vs. ethanol group. TG: triglyceride, TC: total cholesterol.
